# Supplementary material for: Steroid sulfatase deficiency causes cellular senescence and abnormal differentiation by inducing Yippee-like 3 expression in human keratinocytes
Source: Research Square preprint supplement (doi:10.21203/rs.3.rs-474908/v1), 2021-05-14

# **Steroid sulfatase deficiency causes cellular senescence and abnormal differentiation by inducing Yippee-like 3 expression in human keratinocytes**

Hyoung-Seok Baek<sup>1†</sup>, Tae-Uk Kwon<sup>1†</sup>, Sangyun Shin<sup>1</sup>, Yeo-Jung Kwon<sup>1</sup> & Young-Jin Chun<sup>1\*</sup>

<sup>1</sup>College of Pharmacy and Center for Metareceptome Research, Chung-Ang University, Seoul, Republic of Korea 06974

† Both authors contributed equally to this work.

\*Corresponding author. Prof. Young-Jin Chun, College of Pharmacy and Center for Metareceptome Research, Chung-Ang University, Seoul, Republic of Korea 06974

*E-mail address:* [yjchun@cau.ac.kr](mailto:yjchun@cau.ac.kr) (Y.J. Chun)

Original panel for each western blot

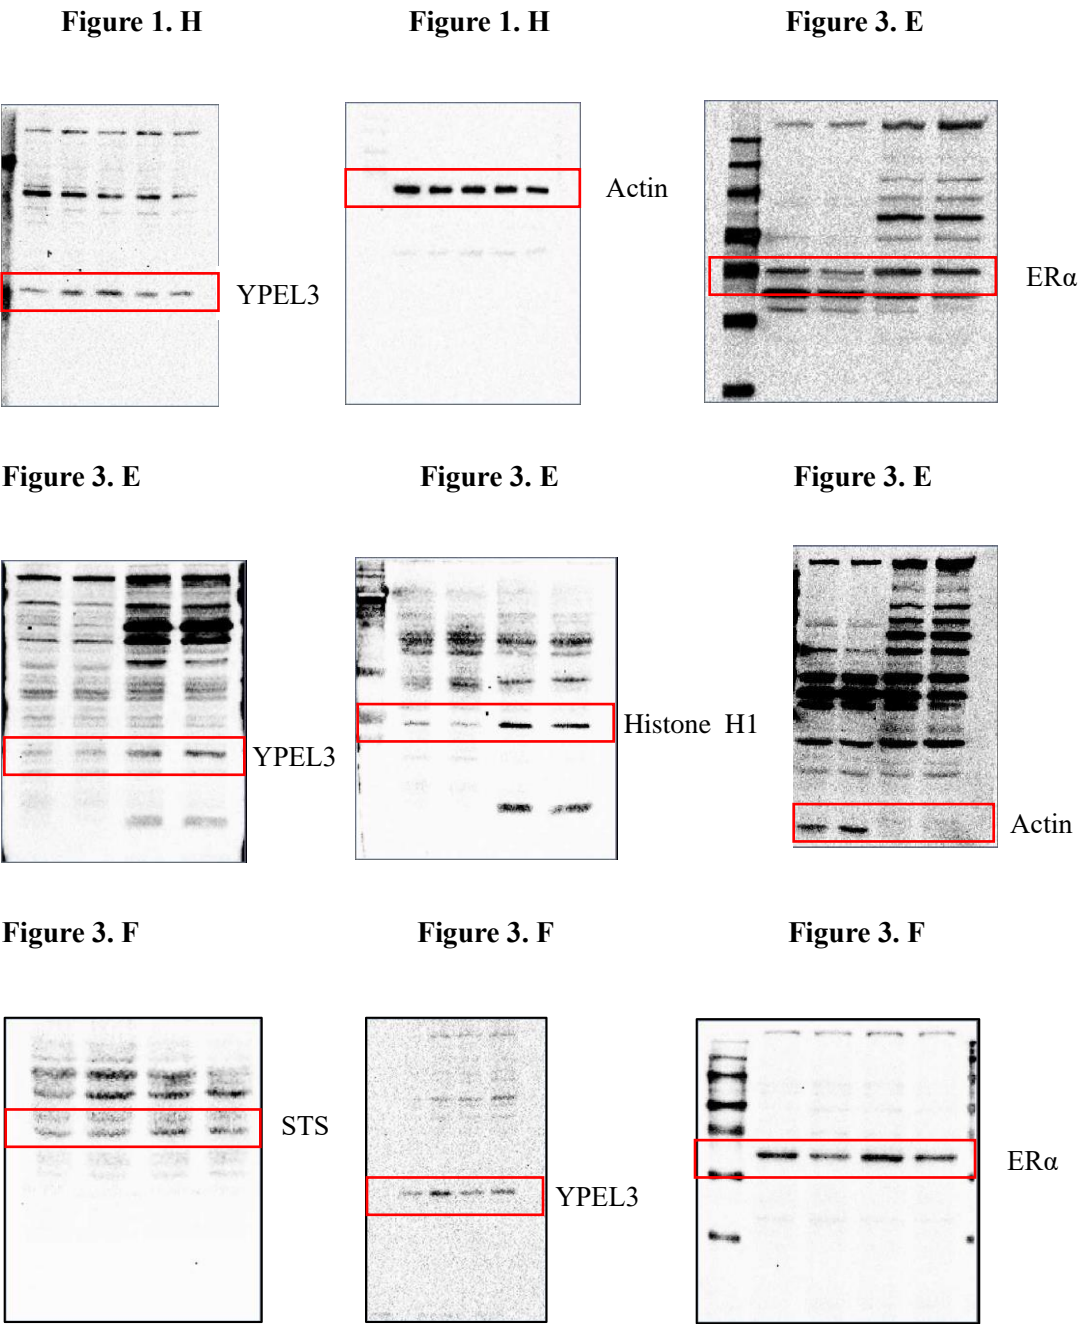

**Figure 3. F**

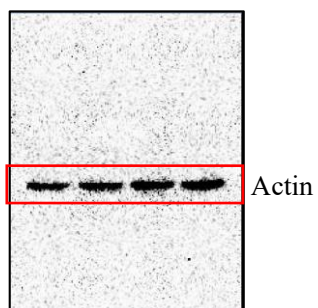

**Figure 4. B**

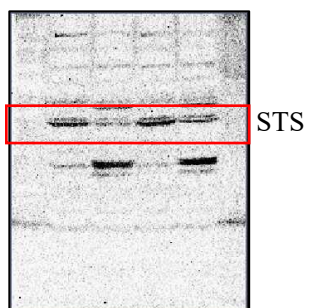

**Figure 4. B**

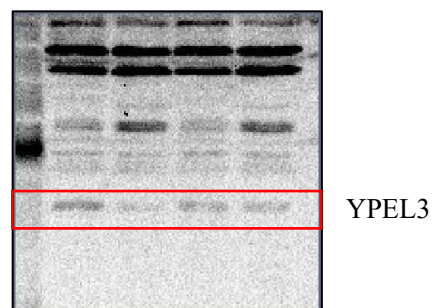

**Figure 4. B**

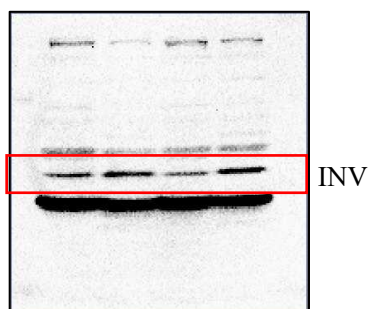

**Figure 4. B**

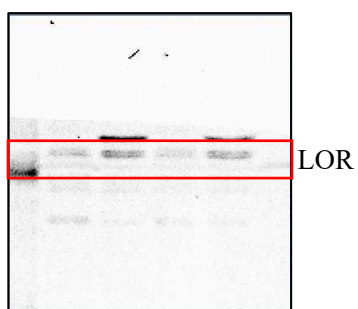

**Figure 4. B**

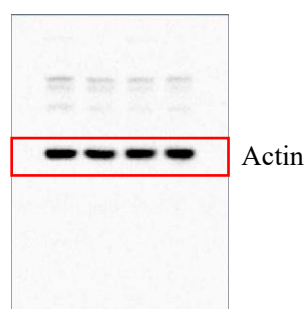

**Figure 4. E**

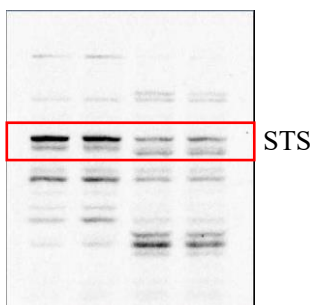

**Figure 4. E**

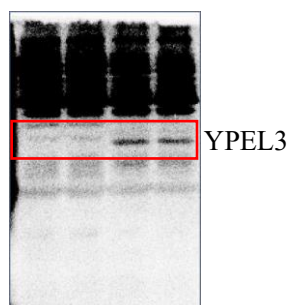

**Figure 4. E**

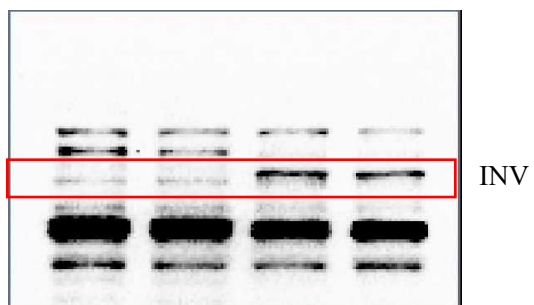

**Figure 4. E**

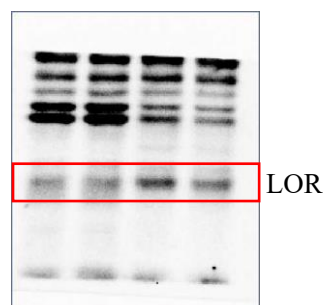

**Figure 4. E**

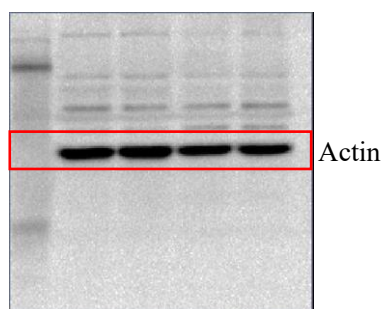

Supplement: Supplementary file 1 [file 9aad358073398a674f649549.pdf]
